# Supplementary material for: Rapid and facile colorimetric biosensing of dengue NS1 antigen using gold nanoparticles: potential for point-of-care testing
Source: Royal Society of Chemistry journal article supplement (doi:10.1039/d5ra10028c), 2026-03-30
Supplement: d5ra10028c1.pdf [file d5ra10028c1.pdf]

## Supplementary Information

### Rapid and facile colorimetric biosensing of dengue NS1 antigen using gold nanoparticles: Potential for Point-of-Care Testing

*Annisa Indah Reza,<sup>a</sup> Fitri Fadila,<sup>b</sup> Dita Cinta Toharani,<sup>c</sup> Dita Ariyanti,<sup>d</sup> Agustina Vidiawati,<sup>e</sup> Nagatoshi Nishiwaki<sup>\*e,f</sup> and Agustina Sus Andreani<sup>\*a</sup>*

<sup>a</sup>Research Center for Chemistry, National Research and Innovation Agency (BRIN), Kawasan PUSPITEK Building 456, Serpong, Tangerang Selatan, Banten 15314, Indonesia

<sup>b</sup>Department of Chemistry. Faculty of Mathematics and Natural Sciences. Universitas Negeri Semarang. Semarang 50229. Indonesia

<sup>c</sup>Department of Chemistry. Faculty of Military Mathematics and Natural Sciences. The Republic of Indonesia Defense University. Bogor. Indonesia

<sup>d</sup>Research Centre for Applied Microbiology. National Research and Innovation Agency (BRIN). Bogor. West Java 16911. Indonesia

<sup>e</sup>Department of Chemistry. Syarif Hidayatullah State Islamic University. Jl. Ir. H. Djuanda No. 95. Ciputat. Banten 15412. Indonesia

<sup>e</sup>School of Engineering Science, Chemistry Department, Kochi University of Technology, Tosayamada, Kami, Kochi 782-8052, Japan

<sup>f</sup>Research Center of Molecular Design, Kochi University of Technology, Tosayamada, Kami, Kochi 782-8052, Japan

*Keywords:* dengue virus, gold nanoparticles, colorimetric biosensor, surface modification, NS1 antigen

\*Corresponding author:

1. Agustina Sus Andreani

Email: agus147@brin.go.id

2. Nagatoshi Nishiwaki

Email: nishiwaki.nagatoshi@kochi-tech.ac.jp

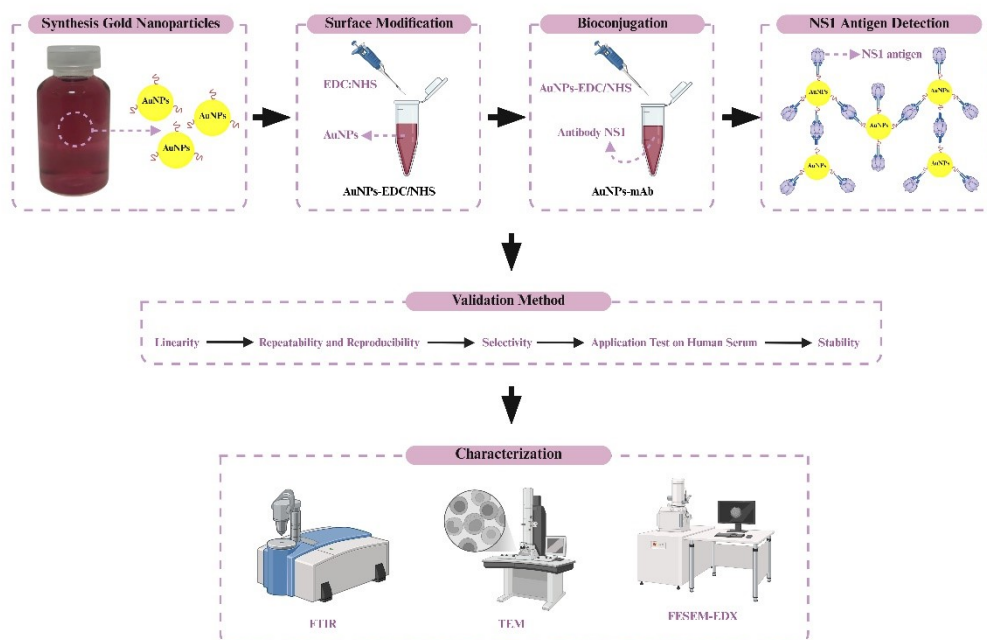

**Fig. S1** Schematic depiction of AuNPs synthesis and colorimetric biosensors protocol.

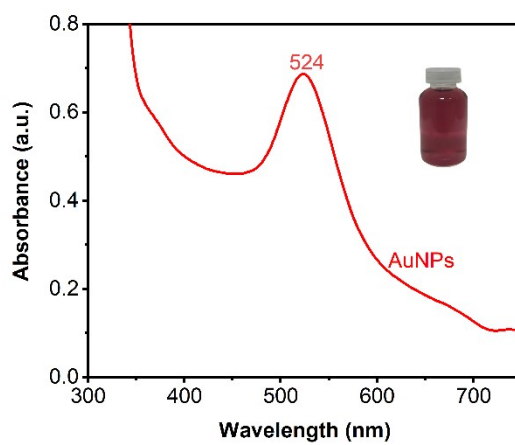

**Fig. S2** UV-vis absorption spectrum of synthesized AuNPs using *o*-HBA at optimum conditions.

**Table S1** UV-vis data to plot linearity curve.

| Concentration | Abs (524 nm) | del.abs   |
|---------------|--------------|-----------|
| Control       | 0.0975846    |           |
| 75            | 0.0805928    | 0.0169918 |
| 100           | 0.0781599    | 0.0194247 |
| 150           | 0.0703576    | 0.027227  |
| 200           | 0.0668346    | 0.03075   |
| 250           | 0.0621214    | 0.0354632 |

Control: only AuNPs-EDC/NHS (ratio 2:1)

**Table S2** UV-vis data to plot LoD and LoQ

| Concentration (ppb) | Abs       | $\Delta$ Abs | y1     | y-y1                            | (y-y1) <sup>2</sup> |
|---------------------|-----------|--------------|--------|---------------------------------|---------------------|
| 75                  | 0.0805928 | 0.0169918    | 0.0169 | 0.0000918                       | 0.00000000842724    |
| 100                 | 0.0781599 | 0.0194247    | 0.0194 | 0.0000247                       | 0.00000000061009    |
| 150                 | 0.0703576 | 0.027227     | 0.0244 | 0.002827                        | 0.000007991929      |
| 200                 | 0.0668346 | 0.03075      | 0.0294 | 0.00135                         | 0.0000018225        |
| 250                 | 0.0621214 | 0.0354632    | 0.0344 | 0.0010632                       | 0.00000113039424    |
|                     |           |              |        | <b>Total</b>                    | 0.00001095386057    |
|                     |           |              |        | <b>SD</b>                       | 0.00165483085       |
|                     |           |              |        | <b>LoD (ng mL<sup>-1</sup>)</b> | 49.6449255          |
|                     |           |              |        | <b>LoQ (ng mL<sup>-1</sup>)</b> | 165.483085          |

Control: 0.0975846

**Table S3** Uv-vis data to plot repeatability of AuNPs-NS1 at 523 nm.

| <b>Concentration<br/>(ng/mL)</b> | <b>Data</b>  |              |              |                    |                           | <b>% AOAC</b> | <b>CV Horwitz</b> |
|----------------------------------|--------------|--------------|--------------|--------------------|---------------------------|---------------|-------------------|
|                                  | <b>Abs 1</b> | <b>Abs 2</b> | <b>Abs 3</b> | <b>Average Abs</b> | <b>Standard Deviation</b> |               |                   |
| 75                               | 0.080593     | 0.08097      | 0.080043     | 0.08053533333      | 0.0003806366013           | 0.4726330488  | 1.04425161        |
| 100                              | 0.07816      | 0.0784109    | 0.0782496    | 0.0782735          | 0.0001038142893           | 0.1326301869  | 1                 |
| 150                              | 0.070358     | 0.07113      | 0.071657     | 0.07104833333      | 0.0005334493624           | 0.7508260044  | 0.9407963516      |
| 200                              | 0.066835     | 0.06576      | 0.06537      | 0.06598833333      | 0.0006194935207           | 0.9387924947  | 0.9009288013      |
| 250                              | 0.062121     | 0.06266      | 0.0633676    | 0.0627162          | 0.0005104714945           | 0.813938814   | 0.8711723049      |

**Table S4** UV-vis data to plot reproducibility of AuNPs-NS1 at 523 nm.

| <b>Concentration<br/>(ng/mL)</b> | <b>Data</b>  |              |              |                    |                           | <b>% AOAC</b> | <b>CV Horwitz</b> |
|----------------------------------|--------------|--------------|--------------|--------------------|---------------------------|---------------|-------------------|
|                                  | <b>Abs 1</b> | <b>Abs 2</b> | <b>Abs 3</b> | <b>Average Abs</b> | <b>Standard Deviation</b> |               |                   |
| 75                               | 0.080593     | 0.0818437    | 0.0812961    | 0.08124426667      | 0.0005119099161           | 0.6300874352  | 1.04425161        |
| 100                              | 0.07816      | 0.0784109    | 0.0799426    | 0.07883783333      | 0.00078787467             | 0.99936114    | 1                 |
| 150                              | 0.070358     | 0.0704297    | 0.0708368    | 0.0705415          | 0.00021085                | 0.298902527   | 0.9407963516      |
| 200                              | 0.066835     | 0.066358     | 0.0660754    | 0.0664228          | 0.0003134722954           | 0.4719347806  | 0.9009288013      |
| 250                              | 0.062121     | 0.062354     | 0.061243     | 0.061906           | 0.0004783645751           | 0.7727273205  | 0.8711723049      |

**Table S5** UV-vis data to plot selectivity comparison across different matrices at 523 nm.

| <b>Samples</b> | <b>Abs 1</b> | <b>Abs 2</b> | <b>Abs 3</b> | <b>Average Abs</b> | <b><math>\Delta</math> Absorbansi</b> | <b>Standard Deviation</b> |
|----------------|--------------|--------------|--------------|--------------------|---------------------------------------|---------------------------|
| Aquabidest     | 0.124206     | 0.121243     | 0.120979     | 0.1221426667       | -0.01653766667                        | 0.001462972393            |
| Antigen NS1    | 0.0945662    | 0.0921104    | 0.0905038    | 0.09239346667      | 0.01321153333                         | 0.001670502618            |
| Glucose        | 0.113022     | 0.114004     | 0.111553     | 0.1128596667       | -0.007254666667                       | 0.001007179009            |
| Cholesterol    | 0.127057     | 0.122719     | 0.122551     | 0.124109           | -0.018504                             | 0.002085678786            |
| Uric acid      | 0.112611     | 0.110445     | 0.108398     | 0.1104846667       | -0.004879666667                       | 0.001720178737            |

Control: 0.105605

**Table S6** UV-vis data to plot stability profile at 523 nm.

| <b>Time</b> | <b>Abs 1</b> | <b>Abs 2</b> | <b>Abs 3</b> | <b>Average Abs</b> | <b>Standard Deviation</b> |
|-------------|--------------|--------------|--------------|--------------------|---------------------------|
| 0 Day       | 0.115357     | 0.108908     | 0.104888     | 0.1097176667       | 0.004312127111            |
| 1 Day       | 0.0878918    | 0.0875235    | 0.0865881    | 0.08733446667      | 0.0005487614074           |
| 3 Day       | 0.0887379    | 0.0828103    | 0.0836319    | 0.08506003333      | 0.002622185355            |
| 1 Week      | 0.0831786    | 0.0830726    | 0.0827331    | 0.08299476667      | 0.0001900194434           |
| 2 Week      | 0.0869726    | 0.0865779    | 0.0866716    | 0.0867407          | 0.0001683807788           |
| 3 Week      | 0.0804819    | 0.0805987    | 0.0801742    | 0.08041826667      | 0.0001790474115           |
| 4 Week      | 0.0800271    | 0.0799079    | 0.0797404    | 0.0798918          | 0.0001175971372           |

**Table S7** UV-vis data to plot the application of AuNPs-mAb on human serum at 523 nm.

| <b>Sample</b>     | <b>Abs 1</b> | <b>Abs 2</b> | <b>Abs 3</b> | <b>Average Abs</b> | <b><math>\Delta</math> Absorbance</b> | <b>Standard Deviation</b> |
|-------------------|--------------|--------------|--------------|--------------------|---------------------------------------|---------------------------|
| Human Serum       | 0.148148     | 0.147187     | 0.14635      | 0.1472283333       | -0.03077333333                        | 0.0007346120669           |
| Human Serum NS1   | 0.10732      | 0.107642     | 0.109672     | 0.1082113333       | 0.008243666667                        | 0.001041179246            |
| Antigen NS1       | 0.0980129    | 0.0982826    | 0.0970179    | 0.09777113333      | 0.01868386667                         | 0.0005438779663           |
| Control: 0.116455 |              |              |              |                    |                                       |                           |

## TEM Images

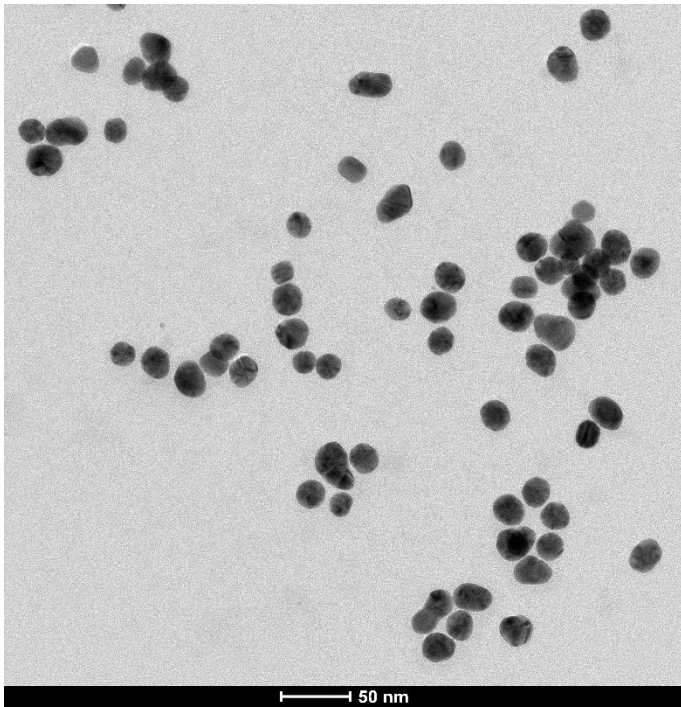

**A. TEM for AuNPs**

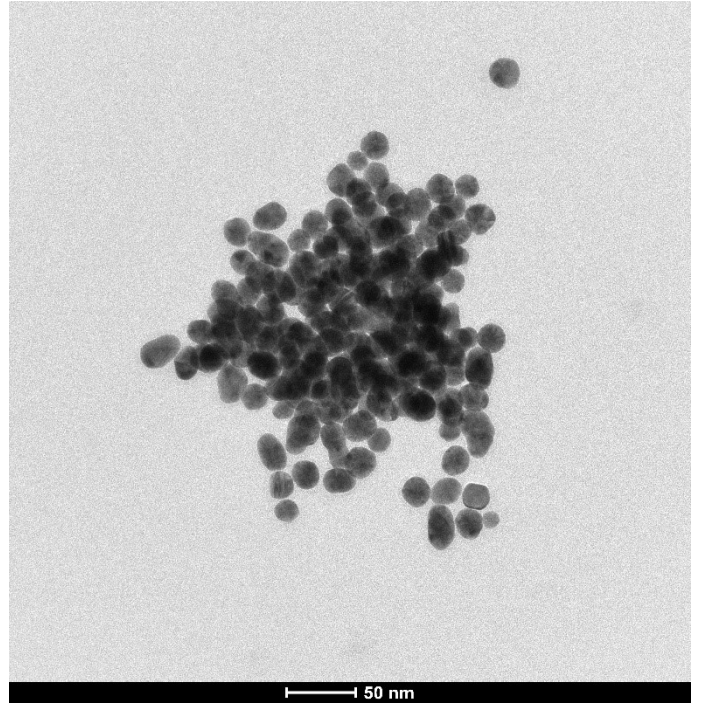

**B. TEM for AuNPs-mAb**

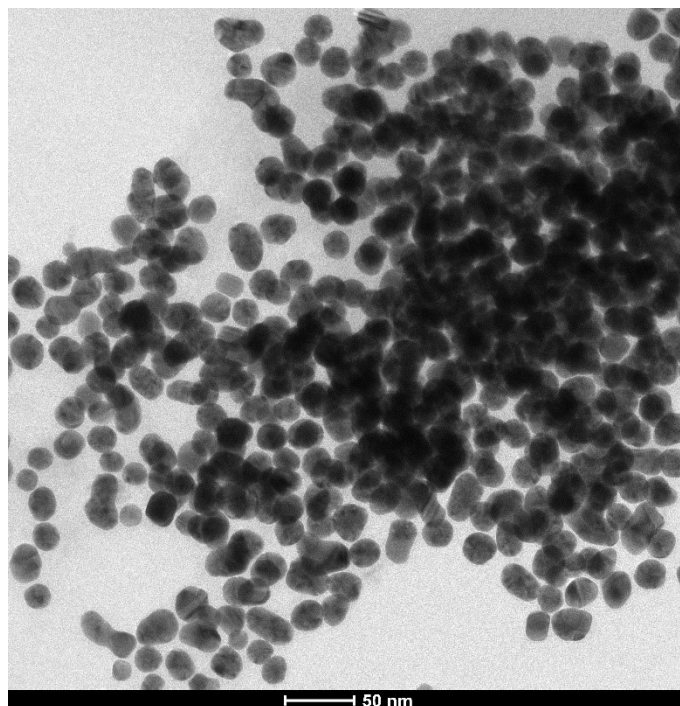

**C. TEM for AuNPs-mAb-NS1**

# FESEM Images for AuNPs

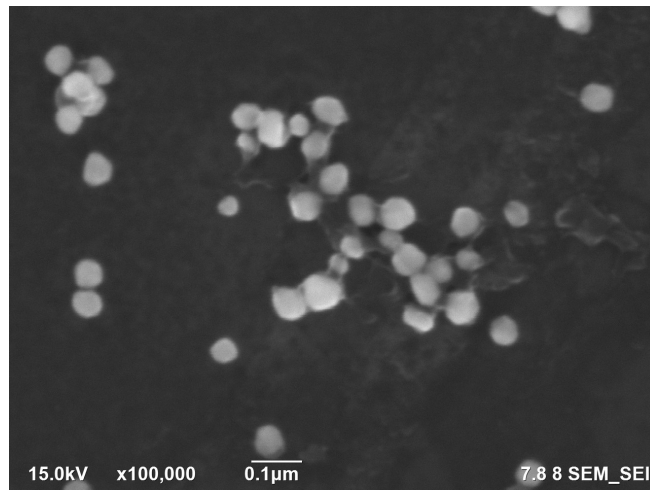

Au Mα1

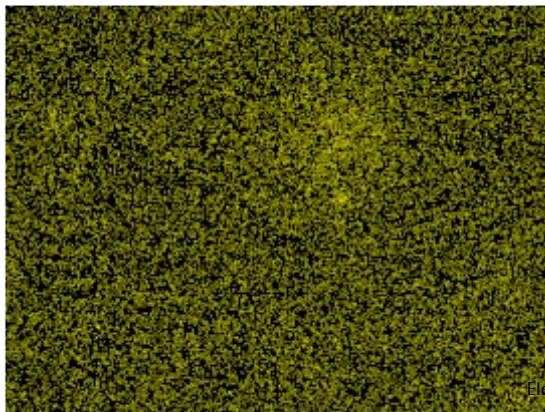

C Kα1\_2

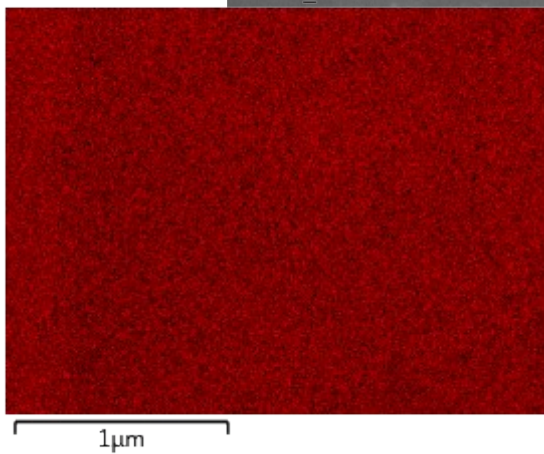

O Kα1

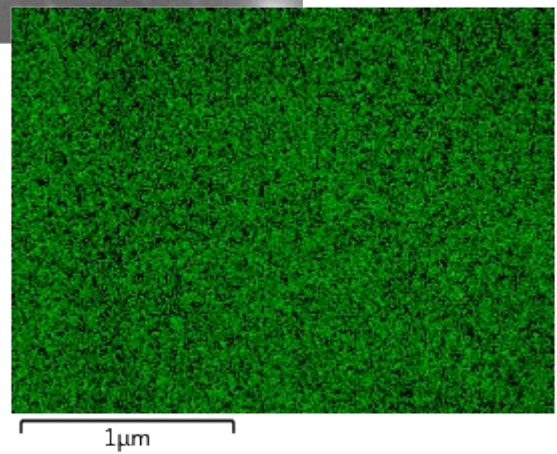

EDS Layered Image 1

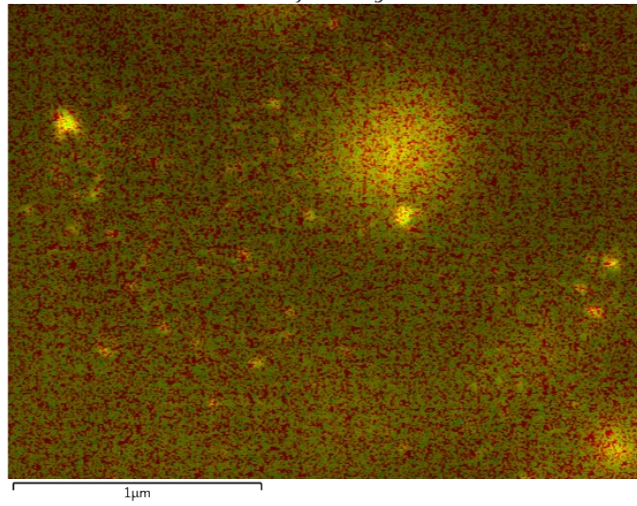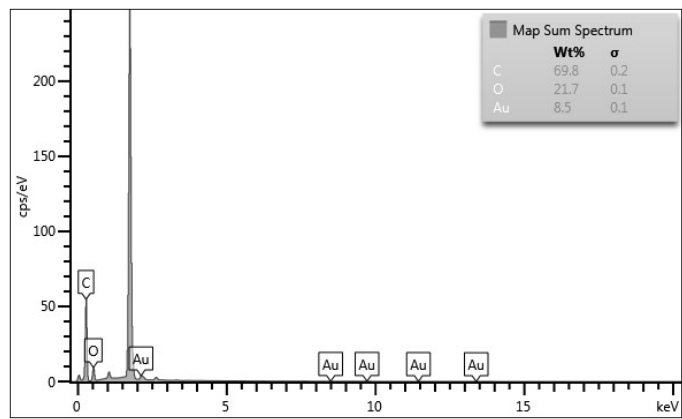

### EDX for AuNPs.

### FESEM Images for AuNPs-mAb

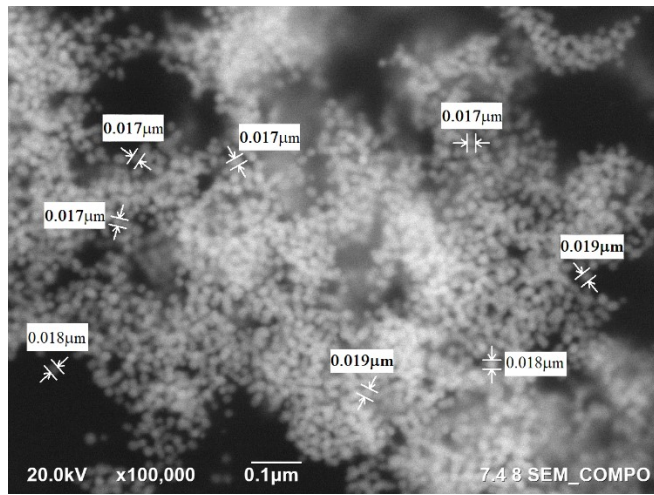

Electron Image 1

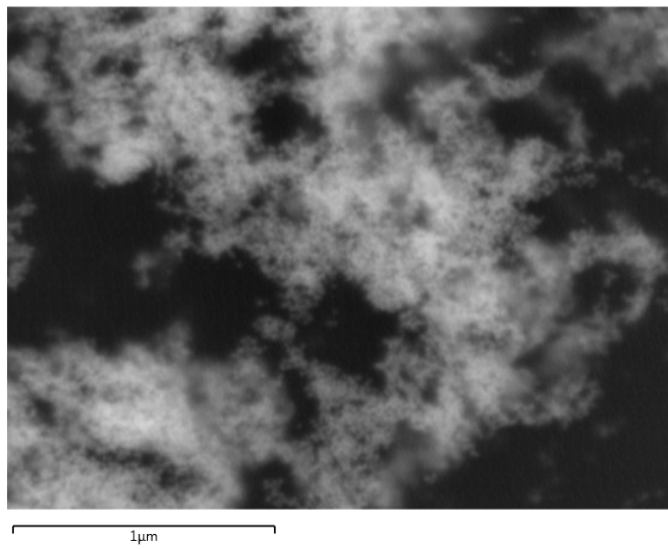

C K $\alpha$ 1\_2

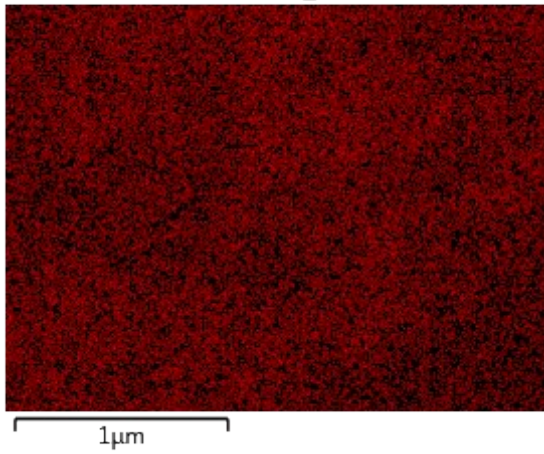

N K $\alpha$ 1\_2

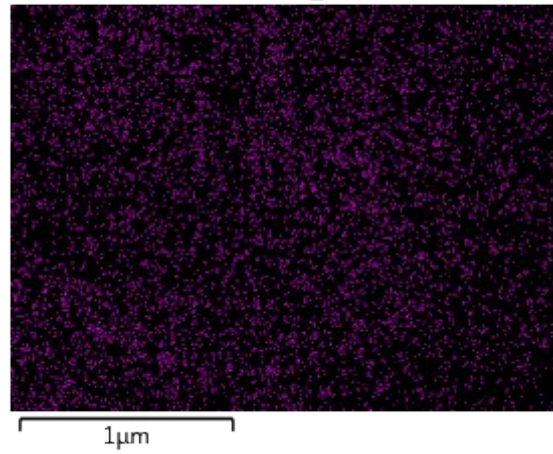

EDS Layered Image 1

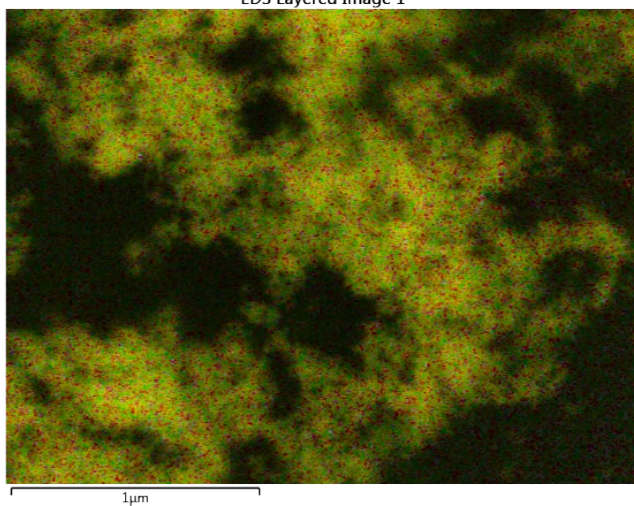

Au Mα1

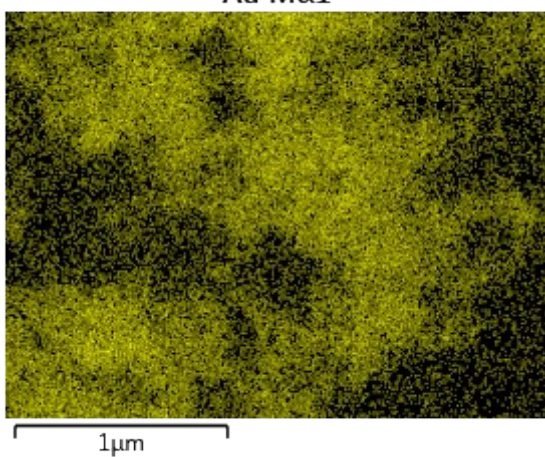

O Kα1

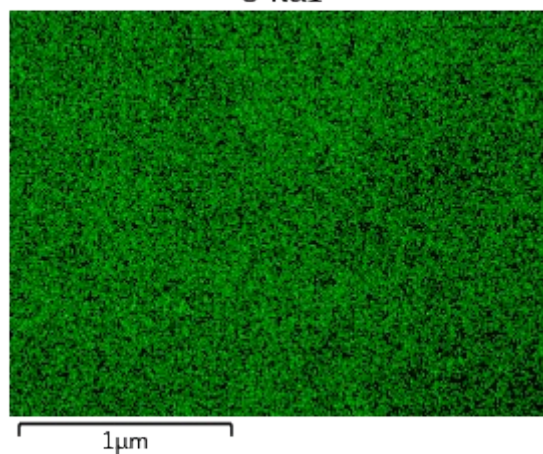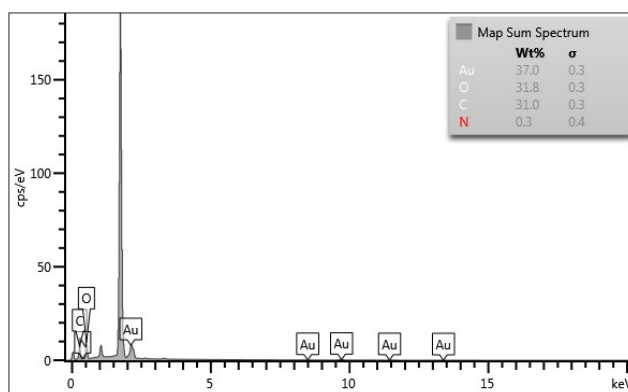

EDX for AuNPs-mAb.

# FESEM Images for AuNPs-mAb-NS1

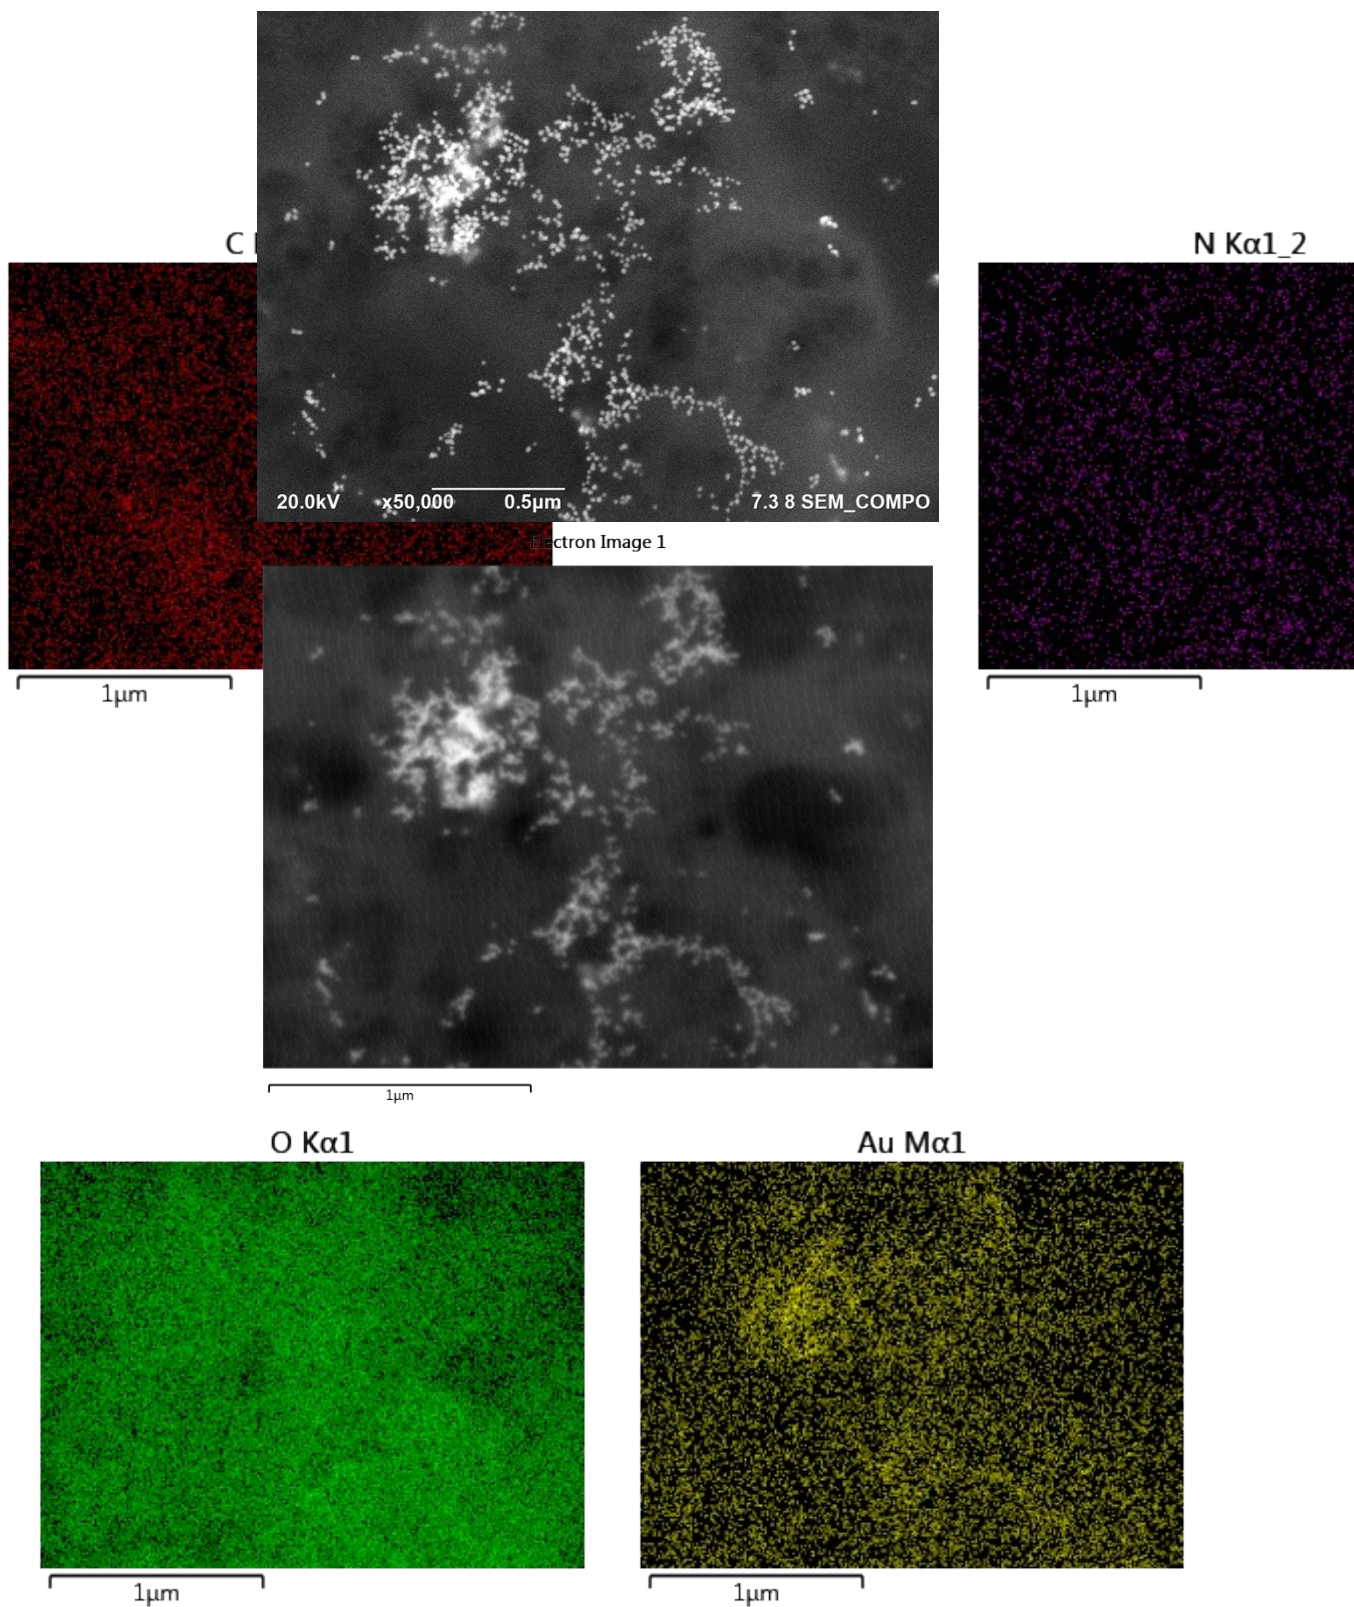

EDS Layered Image 1

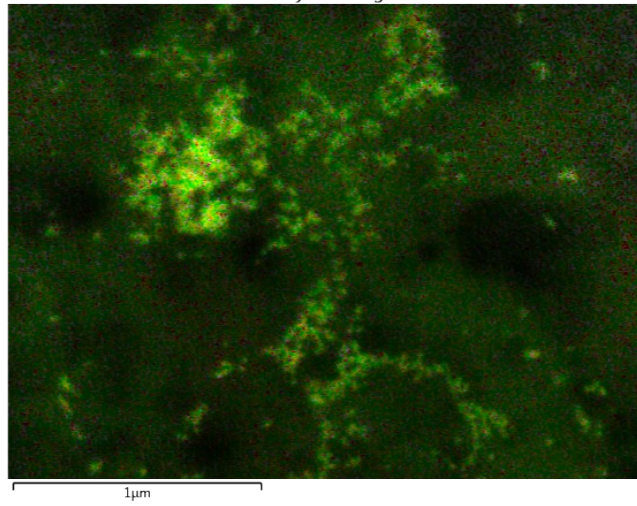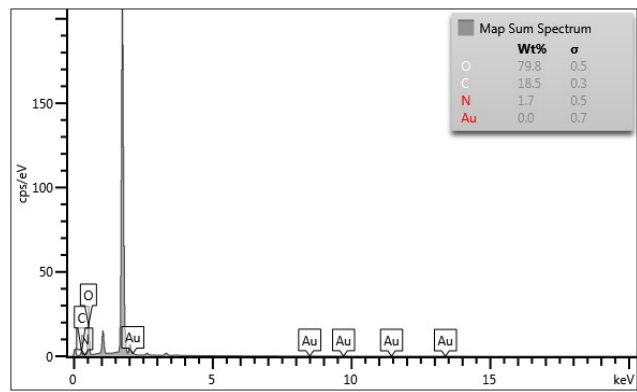

**EDX for AuNPs-mAb-NS1.**
